# Supplementary material for: Twin arginine translocase pathway and fast-folding lipoprotein biosynthesis in E. coli : interesting implications and applications
Source: Royal Society of Chemistry journal article supplement (doi:10.1039/b916510j), 2010-02-15
Supplement: b916510j.pdf [file b916510j.pdf]

## Twin arginine translocase pathway and fast-folding lipoprotein biosynthesis in *E. coli*: interesting implications and applications

Hamsanathan Shruthi, Prakash Anand, Vadivel Murugan and Krishnan Sankaran\*

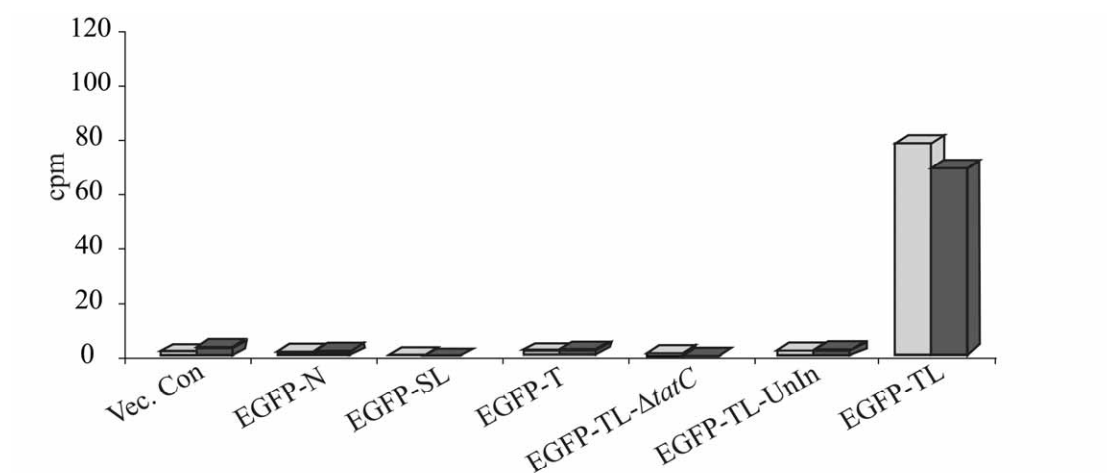

**Supplementary Fig. Radioactivity associated with EGFP bands in modified Tricine-SDS PAGE:** The release of ester-linked radioactive palmitate □ upon alkali hydrolysis of EGFP bands is significant only in EGFP-TL, while the remaining radioactivity still associated with the band is mainly due to amino-linked palmitate ■
